# Supplementary material
Source: PubMed Central journal article supplement (PMC3833949)
Supplement: NIHMS516875-supplement-109_2013_1075_MOESM1_ESM.pdf [file NIHMS516875-supplement-109_2013_1075_MOESM1_ESM.pdf]

**J Mol Med 2013**

**Electronic Supplementary Material**

***The ACMSD* gene, involved in tryptophan metabolism, is mutated in a family with cortical myoclonus, epilepsy, and parkinsonism**

Jose Felix Martí-Massó, Alberto Bergareche, Vladimir Makarov, Javier Ruiz-Martinez, Ana Gorostidi, Adolfo López de Munain, Juan Jose Poza, Pasquale Striano, Joseph D. Buxbaum, and Coro Paisán-Ruiz

## Electronic Supplementary Material (ACMSD mutation in FCMTE)

| Primer name    | Primer sequences (5'-3') |
|----------------|--------------------------|
| ACMSDx1F       | GGTTGCTGTAAAGGGACTAAG    |
| ACMSDx1R       | CCCACCAAAGCAGATAAAC      |
| ACMSDx2F       | CAATGCTTGAAAGGTGGAG      |
| ACMSDx2R       | GAAGAGTGGGGTTCCCTG       |
| ACMSDx3F       | CTGATTTCTACTTCCACAAGG    |
| ACMSDx3R       | CACAGTGAAGCTGGAACAG      |
| ACMSDx4F       | GGAGGAGTTTAGGGTGGAG      |
| ACMSDx4R       | AGTGGTACTGGTGTCCAAAC     |
| ACMSDx5F       | TGGTAAAGCCACTGAAAATG     |
| ACMSDx5R       | GTGACGCTTCACCTCCTC       |
| ACMSDx6F       | CTCAGAGAAAAGCAGTTTCC     |
| ACMSDx6R       | AGCTCAGTAAGTGATAGCTGC    |
| ACMSDx7F       | CTCCTTGCCAAAGTAATGTC     |
| ACMSDx7R       | AAAAGGAGGAGAAACCAAAG     |
| ACMSDx8F       | GGCCTACAGTAACTTCTTGC     |
| ACMSDx8R       | AATACCTTTCTTCCATCCC      |
| ACMSDx9F       | TGACAGGAATGTTTGAATAAG    |
| ACMSDx9R       | AATGGTTCCTCTGTTCTTTG     |
| ACMSDx10F      | AAGAGATTCAGTGTATAACCTGC  |
| ACMSDx10R      | TTTAGGATATTTGGGACATTC    |
| MYBBP1Ax1-2F   | GCCACAGCTGAGACACCA       |
| MYBBP1Ax1-2R   | CTCCGAGCCGACACAAAC       |
| MYBBP1Ax3-5F   | TGTTCCAGATTCTCATCCGA     |
| MYBBP1Ax3-5R   | GGGGAAGGGAGGTTAAGGTT     |
| MYBBP1Ax6F     | CAGGCCAAACGACAAATCT      |
| MYBBP1Ax6R     | CCGTGTCAGGAGCAGGTAGA     |
| MYBBP1Ax7-8F   | ACTACCCAGACGGAGGGG       |
| MYBBP1Ax7-8R   | AGGCCCAGATTTGTCGTTT      |
| MYBBP1Ax9F     | GTTTAGAGCCAGGACGCTGT     |
| MYBBP1Ax9R     | GTTGGGCTGTTGGGCTGT       |
| MYBBP1Ax10F    | TGACTCAACCCAAAGGCTTC     |
| MYBBP1Ax10R    | TCCTGACCTCGAGTGATTGG     |
| MYBBP1Ax11F    | CAGCTTAGGGGACCTGGAG      |
| MYBBP1Ax11R    | CTCCTGGCCTTGTACCCTC      |
| MYBBP1Ax12-13F | CACAGCCCTCAAAGCCT        |
| MYBBP1Ax12-13R | TAGTAGGTCCTGGAGAGGCG     |
| MYBBP1Ax14-15F | GGAGGCTGGAGGCTGAAG       |
| MYBBP1Ax14-15R | GCTTCTTGATGCCACTGCT      |
| MYBBP1Ax16-17F | TCCACCCTGAGGGACAGA       |
| MYBBP1Ax16-17R | GGTCTTTGGTCAAGGCTGAG     |
| MYBBP1Ax18F    | GAAGGCGCTGGTGAGTGG       |
| MYBBP1Ax18R    | AGGAGGGCAGGTCAGCAAC      |
| MYBBP1Ax19F    | GACTTCCAGATCCGGGTGAG     |
| MYBBP1Ax19R    | CTCCTTCTGTGCAGACAGC      |
| MYBBP1Ax20F    | CCTCTGTCGTCTTCTAGGTC     |
| MYBBP1Ax20R    | CTGGCCTACCTTCATCAG       |
| MYBBP1Ax21-22F | GGGCCTCACAATATCCAGTC     |
| MYBBP1Ax21-22R | GCCTTCTGATGAAGGTAGGC     |
| MYBBP1Ax23-24F | GCACTGAGAAGTTTCCCCAC     |
| MYBBP1Ax23-24R | CAGCAGGCAGCCTCACAC       |
| MYBBP1Ax25F    | GTGTGTGCAGCGTGTGTGT      |
| MYBBP1Ax25R    | GCAGAGGTGGGAAGACTGG      |
| MYBBP1Ax26_1F  | AAAATAGGCGTCTCAGGCAG     |
| MYBBP1Ax26_1R  | AGGACAAAGGCTAAGTCCC      |
| MYBBP1Ax26_2F  | TCTTCTGCAGTTTGGGGAT      |
| MYBBP1Ax26_2R  | GAATCCAGGTGGAGGTAGCA     |
| MYBBP1Ax27F    | CCCCAGCGATGTTTTCTTG      |
| MYBBP1Ax27R    | TTTTGCTGTGAGGGAGCC       |

Primer sequences of both *ACMSD* and *MYBBP1A* genes used in this study.
